# 1 **Serotype has a significant impact on the** 2 **virulence of 7th pandemic *Vibrio cholerae* O1**

3 Impact of Serotype on Virulence of Seventh Pandemic *V. cholerae* O1.

4

5 Stefan L Nordqvist<sup>1</sup>, Kaisa Thorell<sup>2,3</sup>, Frida Nilsson<sup>1</sup>, Madeleine Lofstrand<sup>1</sup>, Arvid  
6 Hagelberg<sup>1</sup>, Jan Holmgren<sup>1</sup>, Michael R. Lebens<sup>1\*</sup>

7

8 1. Department of Microbiology and Immunology and Gothenburg University  
9 Vaccine Research Institute (GUVAX), Institute of Biomedicine, Sahlgrenska  
10 Academy at University of Gothenburg, Box 435, SE-405 30 Göteborg,  
11 Sweden

12 2. Department of Infectious Diseases, Institute of Biomedicine, Sahlgrenska  
13 Academy at University of Gothenburg, Box 480, SE-405 30 Göteborg,  
14 Sweden

15 3. Department of Microbiology, Tumor and Cell Biology, Karolinska Institutet,  
16 SE- 17164 Solna, Sweden

17 \*Corresponding author. Email: [michael.lebens@microbio.gu.se](mailto:michael.lebens@microbio.gu.se)

18 [ORCID:](#)

19

20

## 21 Abstract

22 Of over 200 different identified *Vibrio cholerae* serogroups only the O1 serogroup is  
23 consistently associated with endemic and epidemic cholera disease. The O1  
24 serogroup has two serologically distinguishable variants, the Ogawa and Inaba  
25 serotypes, which differ only by a methyl group present on the terminal sugar of the  
26 Ogawa O-antigen but absent from Inaba strains. This methylation is catalyzed by a  
27 methyltransferase encoded by the *wbeT* gene, which in Inaba strains is disrupted by  
28 mutation. It is currently thought that there is little difference between the two  
29 serotypes. However, here we show, using isogenic pairs of O1 El Tor *V. cholerae*,  
30 that Inaba strains show significantly different patterns of gene expression and are  
31 significantly less able than the corresponding Ogawa strains to cause cholera in an  
32 infant mouse infection model. Our results suggest that changes in gene expression  
33 resulting from the loss of the *wbeT* gene lead to reduced virulence and possibly also  
34 reduced survival fitness outside the human host.

35

## 36 Author Summary

37 The bacterium *Vibrio cholerae* causes the pandemic diarrheal disease cholera.  
38 Despite many identified serotypes of *V. cholerae* only one, O1, causes pandemic  
39 cholera. The O1 serotype of pandemic *V. cholerae* has two distinguishable variants  
40 (called Ogawa and Inaba) long considered to be clinically and epidemiologically  
41 equivalent. Cholera outbreaks consist only of one the two variants at any time. In  
42 general, Ogawa strains cause the majority of outbreaks with relatively short-lived  
43 Inaba outbreaks occurring sporadically. We have suggested earlier that Inaba  
44 outbreaks occur during periods of environmental selective pressure against the  
45 Ogawa serotype. We demonstrate here that the two variants are not clinically  
46 equivalent. The Ogawa serotype is better able to respond to infection in an animal  
47 model by up regulating the expression of virulence genes essential for disease  
48 development. We suggest that this phenomenon is the result of wider ranging  
49 differences in gene expression resulting from the mutation that converts Ogawa into  
50 Inaba strains, and may help to explain the dominance of the Ogawa serotype in  
51 nature.

## 52 Introduction.

53 Cholera is the most severe of all the infectious diarrheal diseases and a major health  
54 problem particularly in Asia and sub-Saharan Africa where endemic disease and  
55 epidemic outbreaks cause significant morbidity and mortality. It is accepted that  
56 cholera is under-reported but even so, there are an estimated 2.86 million cases per  
57 year in endemic areas alone resulting in 100,000 deaths, the majority in sub-  
58 Saharan Africa(1, 2). The causative agent of cholera is the bacterium *Vibrio cholerae*  
59 which produces a powerful enterotoxin (cholera toxin) and infection is spread mainly  
60 via contaminated water or food. *V. cholerae* thrives in brackish and estuarine waters  
61 worldwide but of over 200 different identified serogroups, only the O1 serogroup is  
62 associated with pandemic cholera. Although the O139 serogroup emerged briefly in  
63 the 1990s causing widespread outbreaks in Asia, the O1 serogroup caused all seven  
64 cholera pandemics that have occurred since the beginning of the 19th century and is  
65 effectively the sole cause of cholera worldwide in modern times(2). The ongoing 7<sup>th</sup>  
66 pandemic which started in the 1960s is caused by organisms of the El Tor biotype  
67 that share a clonal origin from a common ancestor which appears to have emerged  
68 in the early 20th century. The previous six pandemics are thought to have been  
69 caused by the classical biotype which is now extinct as a cause of pandemic cholera  
70 but which was also of the O1 serogroup(3).

71 In both *V. cholerae* biotypes, the O1 serogroup has two serologically distinguishable  
72 variants, the Ogawa and Inaba serotypes. The only apparent difference between  
73 them is the methylation of the terminal sugar of the poly-perosamine O-antigen in  
74 Ogawa strains catalyzed by an S-adenosylmethionine (SAM)-dependent  
75 methyltransferase encoded by the *wbeT* gene. In Inaba strains, this gene is  
76 inactivated by mutation(4, 5). Prevailing opinion suggests that there is no difference  
77 between the two serotypes with respect to their ability to cause cholera or to survive  
78 in the environment(6, 7). However, worldwide cholera caused by the Ogawa  
79 serotype is predominant and recent work suggests that serotype switches may result  
80 from selective pressure based on the structure of the O-antigen(8).

81 Whole-genome sequencing of large numbers of clinical isolates shows that Inaba  
82 lineages generally tend to emerge and then die out. New Inaba outbreaks when  
83 occurring, are caused by Inaba strains arising from mutations in circulating Ogawa  
84 strains, suggesting that Ogawa strains are overall fitter than Inaba strains (9)

85 although other than the epidemiological evidence, there is little experimental data to  
86 confirm this. We wished to address whether we could observe any differences  
87 between the two serotypes that might account for a difference in virulence and/or  
88 other fitness manifestation and thereby help to explain the predominance of Ogawa  
89 in nature and the persistence of the *wbeT* gene in the O1 serotype. Although  
90 indistinguishable in terms of growth in liquid culture, using isogenic variants of  
91 Ogawa and Inaba we could demonstrate that there are significant differences in  
92 gene expression between the serotypes. Furthermore, Inaba strains are significantly  
93 inferior to Ogawa strains in their ability to colonize the infant mouse intestine and to  
94 cause diarrhea reflecting significant differences in the expression of key virulence  
95 genes. Our results show for the first time that there are underlying differences in  
96 gene expression and virulence between the Ogawa and Inaba serotypes that may  
97 also go some way to explain the predominance of the Ogawa serotype in nature.

## 98 Results

99 Two pairs of isogenic strains of El Tor O1 *Vibrio cholerae* were constructed, each  
100 pair comprising one Inaba and one Ogawa strain. The first set was derived from  
101 strain Phil6973 isolated from a patient in India in 1973 and is currently a component  
102 of all prequalified killed oral cholera vaccines. Phil6973 has the Inaba serotype due  
103 to a stop codon at position 252 in the *wbeT* gene. It was converted to the Ogawa  
104 serotype by replacing the mutant *wbeT* gene with a wild-type gene from the Ogawa  
105 strain VX44945 resulting in the strain MS1571. Subsequently, the *wbeT* gene in  
106 MS1571 was deleted in order to produce the Inaba strain MS1712, in which the  
107 *wbeT* gene was entirely absent. A second pair of isogenic strains was generated  
108 from the clinical Ogawa isolate A493 isolated in Bangladesh in 2012. The *wbeT* gene  
109 was deleted in a similar fashion to generate the Inaba strain MS1843. However,  
110 when the genome of MS1843 was sequenced it was found that apart from the  
111 deletion of the *wbeT* gene there was a non-synonymous mutation in the *crp* gene  
112 (I52S). The parental strain A493 did not carry this mutation and a new strain MS1972  
113 was constructed in which the *crp* sequence corresponded with the wild type.  
114 Subsequent experiments were performed with both *wbeT* deletion strains, MS1843  
115 and MS1972 as well as the original Inaba strain Phil6973.

### 116 Growth comparison in rich medium.

117 When isogenic strains MS1571 and MS1712 were grown LB medium, high salt  
118 medium and AKI medium there was no detectable difference in growth between the  
119 Ogawa and Inaba variants ((figures 1a, 1b and 1c respectively). Similar results were  
120 obtained with the isogenic pairs A493 and MS1972 (Supplementary figure S1).  
121 Competition experiments performed *in vitro* also demonstrated that when grown in a  
122 co-culture neither variant out-grew the other (data not shown).  
123 Growth under AKI conditions induces the expression of virulence genes in 7<sup>th</sup>  
124 pandemic strains of O1 *V. cholerae* (10). We therefore tested whether there were  
125 any differences in the expression of CT between corresponding Ogawa and Inaba  
126 strains. It was consistently found that Inaba strains expressed higher levels of CT  
127 than their Ogawa counterparts. This is shown for strains MS1571 (Ogawa) and  
128 MS1712 (Inaba) in figure 1d.

129

## 130 Transcriptome analysis of isogenic strains

131 For transcriptomic analysis of the isogenic strains, MS1571 and MS1712 cultures  
132 were grown in triplicate in a high salt medium at low temperature. RNAseq analysis  
133 showed that under these conditions there were significant differences ( $P < 0.01$ ) in the  
134 expression of no less than 472 out of 3519 genes (13,4%) with either higher or lower  
135 expression in the Inaba strain when compared with the Ogawa strain (supplementary  
136 table S1). Of these, 333 were expressed at higher levels in the Ogawa strain.

137 Nearly all the genes in the purine pathway were expressed at reduced levels in the  
138 Inaba strain suggesting a lower requirement for adenosine (figure 2A). Similarly,  
139 although genes for methionine synthesis were unaffected, expression of SAM  
140 synthetase was expressed at a significantly lower level in the Inaba strain reflecting a  
141 lower requirement for SAM in these cells. Among genes previously associated with  
142 virulence *CRP*, *toxR*, and *ompT* were all expressed at lower levels in Inaba  
143 compared to Ogawa cells. Genes involved in quorum sensing differed between  
144 Ogawa and Inaba with small but significant differences in *cqsS* and *aphA* (figures 2B  
145 and 3A).

146 Interestingly, a gene that was significantly upregulated in the Inaba strain was *manA*  
147 (VC1827), which encodes mannose-6-phosphate isomerase involved in the  
148 metabolism of fructose and mannose. On closer inspection, we found that the  
149 expression of a number of other genes associated with fructose metabolism were  
150 also altered (figure 3B). In addition to *manA*, the associated permease (VC1826) and  
151 the regulatory gene controlling their expression (VC1825) were also upregulated in  
152 the Inaba strain whilst the surrounding genes also involved in fructose transport were  
153 down-regulated (figure 4). Other examples of gene expression reflecting shifts in  
154 metabolism are shown in supplementary figures S2 and S3.

155

156

157

## 158 Infection of Infant mice

159 The results of the transcriptomics showed that there are profound changes in gene  
160 expression resulting from deletion of the *wbeT* gene. Some of the involved genes  
161 were associated with virulence and might, therefore, impact on the ability of *wbeT*  
162 mutants to respond to changes resulting from the introduction into a host intestine. In  
163 order to investigate this, the ability of isogenic Ogawa and Inaba strains to multiply  
164 and cause cholera in an infant mouse infection model was examined. Groups of  
165 mice were infected with the two pairs of isogenic strains and a number of criteria  
166 were used to assess the severity of infection and disease. The bacteria were  
167 administered together with a blue dye, and the first striking visible difference  
168 between the groups was the amount of stool-associated stain in the cages after 20  
169 hours of observation, figure 5. The Ogawa strains clearly gave more staining than  
170 the same dose of the corresponding Inaba bacteria indicating more diarrhea. A ten-  
171 fold increase in the infecting dose of Inaba bacteria resulted in increased diarrheal  
172 staining which still did not reach the level obtained with the low-dose Ogawa  
173 infection at the same time-point.

174

175

176 The significant difference between the same infecting dose of Ogawa and Inaba  
177 bacteria is also evident for isogenic strains when using more established criteria for  
178 cholera infection and disease in this model; weight loss, the weight ratio of the  
179 intestine to the carcass, and the number of *Vibrio cholerae* bacteria in the intestine,  
180 (figure 6). For the same infection dose, the Ogawa strains (MS1571 and A493) gave  
181 more weight loss than the respective Inaba strains (MS1712 and MS1843/MS1972),  
182 higher intestine to carcass weight, and more *V. cholerae* in the intestine upon  
183 sacrifice. There was no difference between the results obtained in these experiments  
184 between the strains MS1843 and MS1972 as shown in supplementary figure S4.  
185 Importantly, we found that the Phil6973 strain parental Inaba strain and the  $\Delta wbeT$   
186 strain derived from it were both attenuated when compared to the Ogawa derivative  
187 MS1571.

188

## 189 Virulence gene expression in AKI medium and in infant mice.

190 Having demonstrated that Inaba strains are consistently unable to colonize the infant  
191 mouse small intestine as efficiently as the corresponding Ogawa strains it was next  
192 tested whether this was dependent upon differences in expression in key virulence  
193 genes including *tcpA* and *ctxAB*. This was done by analysis of gene expression of  
194 these genes in the intestine of the infected mice using RT-PCR. The results are  
195 shown in figure 7. It can be seen that both *tcpA* and *ctxAB* are highly up-regulated in  
196 the Ogawa strains in the mouse intestine.

197 Conversely, the same genes are relatively up regulated in Inaba strains when grown  
198 in AKI medium. This is in agreement with differences in expression of CT detected in  
199 Inaba strains under full AKI conditions, which as described above, were slightly but  
200 consistently higher than those seen in corresponding Ogawa strains.

201



## 202 Discussion

203 The observation of two serotypes, Ogawa and Inaba, in clinical isolates of *V.*  
204 *cholerae* O1 is recurrent in outbreaks all over the world but the wider biological  
205 implication in terms of colonization and fitness of this switching is not known.  
206 Epidemiological evidence suggests that whereas both serotypes cause cholera, the  
207 Ogawa serotype persistently spreads causing far more cases than Inaba. Whereas it  
208 can be postulated that Ogawa has a better overall fitness than Inaba, no work has  
209 been done to determine at what level this is functioning or the cause of periodic  
210 serotype switching in endemic areas as exemplified by Karlsson et al. (8) and  
211 Baddam et al. (16). The overall similarity of Inaba strains compared to their isogenic  
212 Ogawa counterparts in terms of growth and reported virulence have made  
213 systematic study of differences between the two serotypes difficult and this is  
214 essentially the first study to address this question. Thus, isogenic pairs were  
215 generated from clinical isolates of *V. cholerae* O1 7<sup>th</sup> pandemic strains that were  
216 either Ogawa or Inaba through deletion of the *wbeT* gene.

217 Despite no discernable differences when cultures were grown side-by-side in rich  
218 medium, there were significant differences in gene expression between the Inaba  
219 and Ogawa strains. In all, over four hundred different genes were affected indicating  
220 that deletion of *wbeT* has wider implications than merely abrogating methylation of  
221 LPS.

222 The mechanisms underlying all these transcriptional changes are not fully  
223 understood but a significant down-regulation of genes involved in purine synthesis  
224 and synthesis of SAM in Inaba strains can be attributed to a decreased demand for  
225 these molecules compared to Ogawa strains. Moreover, inactivation of a highly  
226 active SAM-dependent methyltransferase might be expected to have far-reaching  
227 consequences due to changes in ATP and SAM turnover.

228 Many of the differences in gene expression between Ogawa and Inaba strains could  
229 be compensatory adjustments due to altered energy distribution in the cell and,  
230 consistent with this, decreases in expression of one gene resulting from the *wbeT*  
231 mutation could be seen to be balanced by an increase in expression of another gene  
232 with a related function (Figure 5). Further examples are shown in figures S2 and S3.  
233 Thus, unchanged growth in rich medium may reflect adjustments in the expression of  
234 metabolic pathways that occur to maintain intracellular homeostasis.

235 Other changes were seen in genes associated with quorum sensing and virulence.  
236 These may affect responses to environmental stress that are not apparent under the  
237 growth conditions used (17-19) and could be linked to changes in intracellular levels  
238 of SAM. SAM is a precursor to a number of important signaling molecules involved in  
239 quorum sensing (20, 21) and therefore in the ability of cells to sense and respond to  
240 changes in their environment.  
241 The small but significant differences observed in expression of quorum sensing and  
242 virulence genes prompted an analysis of CT expression under AKI conditions under  
243 which Inaba strains consistently produced slightly higher levels than Ogawa strains.  
244 These were the first observed phenotypic differences between the two serotypes and  
245 even suggested that Inaba strains might be more virulent than Ogawa strains.  
246 The infant mouse model is a well-established cholera infection model that is widely  
247 used and mimics acute human disease in several important features including  
248 dependence on the toxin co-regulated pilus (TCP) and expression of CT(22). The  
249 transition from growth in rich medium to growth in the infant mouse intestine is a  
250 dramatic change in environment that imposes significant stress on the bacteria.  
251 Inaba cells were much less able to respond to the change than their Ogawa  
252 counterparts growing significantly less in the intestine and giving rise to significantly  
253 less diarrhea despite producing more CT *in vitro*. This effect was seen in both Inaba  
254 strains Phil6973 and the *wbeT* deletion derivative MS1712.  
255 Strikingly, when the expression of *tcpA*, *ctxAB*, and *toxT* was analyzed in RNA  
256 extracted from the intestine of infected mice, it was seen that in all the mice tested,  
257 the levels of all three genes were up-regulated, but significantly more so in the mice  
258 infected with Ogawa bacteria, with *tcpA* being the most highly up-regulated (figure  
259 7). The higher levels of expression of *ctxAB* by Ogawa cells suggest that despite the  
260 *in vitro* results, Ogawa cells produce more CT *in vivo* than Inaba cells. This again  
261 suggests that the Inaba bacteria are less able to respond to the changes in  
262 environment as they enter the mouse intestine by up-regulating key virulence genes.  
263 The results also demonstrate that the AKI growth conditions do not reflect changes  
264 in virulence gene expression observed *in vivo*.  
265 The observed differences are unlikely to be entirely due to the difference in the  
266 surface LPS but rather reflect other changes in gene expression that result from the  
267 loss of the *wbeT* gene. Indeed, in terms of virulence, the differences observed  
268 between isogenic Ogawa and Inaba strains are very similar to those seen in *crp*

269 mutants that are significantly attenuated in the infant mouse model (23). CRP is a  
270 stress response protein and is one of the genes whose expression was significantly  
271 lower in Inaba strains grown under normal laboratory conditions. It was therefore  
272 unfortunate that when the *wbeT* gene was initially removed from strain A493, a non-  
273 synonymous mutation led to an amino acid change in the *crp* gene. Despite similar  
274 results in the Phil6973 derivatives that did not carry this mutation the *wbeT* deletion  
275 in A493 was repeated and shown not to carry the mutation in *crp*. The results with  
276 this strain were similar and suggest that the *crp* mutation did not play a role in the  
277 reduced ability of the strain to infect infant mice (figure S4).

278 Clearly, much more work needs to be done in order to analyze the gene expression  
279 of the different serotypes in the context of the infection model. However, from the  
280 results so far we can suggest that in addition to the role of the *wbeT* gene in  
281 determining serotype, the impact it has on the distribution of energy and availability  
282 of quorum sensing molecules in the cell is likely to impact virulence, affecting how  
283 cells respond to stresses encountered in the environment and associated with  
284 infection. The loss of *wbeT* in our experiments clearly compromises the severity of  
285 disease caused by *V. cholerae* O1. It remains to be seen whether these differences  
286 are reflected in the amount of diarrhea and the number of bacteria shed from human  
287 individuals infected by the two serotypes. The results are consistent however, with  
288 the observed overall superior ability of Ogawa cells to persist and spread compared  
289 to Inaba strains.

290 Since even slight changes to the O1 serotype result in significant changes in the way  
291 the organisms interact with their environment, our findings may go some way to  
292 explaining the association of the O1 serogroup with cholera over seven pandemics  
293 caused by two biotypes in the last 200 years and the predominance of the Ogawa  
294 serotype. The ability of O1 *V. cholerae* to cause pandemic cholera may be  
295 dependent not only on the O1 serotype but also and possibly primarily on the  
296 maintenance of the *wbeT* gene that is responsible not only for the methylated Ogawa  
297 serotype but also, as indicated by this study, for promotion of bacterial virulence and  
298 perhaps overall survival fitness in nature.

299

## 300 Material and Methods

### 301 Bacterial strains and plasmids

302 The bacterial strains used in the current study are shown in Table 1. All strains were  
303 maintained on Luria Bertani (LB) plates supplemented when necessary with  
304 appropriate antibiotics and stored in a 17% glycerol stock solution at  $-80^{\circ}\text{C}$ . Unless  
305 indicated otherwise, liquid cultures were grown in LB broth at  $37^{\circ}\text{C}$  as previously  
306 described(24).

307 The pML-GreenFP $\lambda$ /cl<sub>857</sub> and pML-BlueFP $\lambda$ /cl<sub>857</sub> were kindly provided by pML-  
308 Biokonsult AB (Sweden).

309

310 **Table 1. Bacterial strains used in the current study.**

| Bacteria           |                    | Genotype or main characteristics                                                                                        | Source                |
|--------------------|--------------------|-------------------------------------------------------------------------------------------------------------------------|-----------------------|
| <i>E. coli</i>     | MFD <sub>pir</sub> | K-12 RP4-2-Tc::[Mu1::aac(3)IV- $\Delta$ aphA- $\Delta$ nic35- $\Delta$ Mu2::zeo] $\Delta$ dapA::(erm-pir) $\Delta$ recA | (25)                  |
|                    |                    |                                                                                                                         |                       |
| <i>V. cholerae</i> | VX44945            | Wild-type clinical isolate El Tor, O1 Ogawa                                                                             | Bangladesh, 1987 (24) |
|                    | Phil6973           | Wild-type clinical isolate El Tor, O1 Inaba                                                                             | India, <1973 (26)     |
|                    | MS1571             | Ogawa derivative of Phil6973                                                                                            | (27)                  |
|                    | MS1712             | Inaba $\Delta$ wbeT derivative of MS1571                                                                                | This study            |
|                    | A493               | Wild-type clinical isolate El Tor, O1 Ogawa                                                                             | Bangladesh, 2012      |
|                    | MS1843             | $\Delta$ wbeT derivative of A493 El Tor, O1 Inaba VC2614(Ile52Ser)                                                      | This study            |
|                    | MS1874             | A493 carrying pML-GreenFP $\lambda$ /cl <sub>857</sub>                                                                  | This study            |
|                    | MS1878             | MS1843 carrying pML-GreenFP $\lambda$ /cl <sub>857</sub>                                                                | This study            |
|                    | MS1882             | A493 carrying pML-BlueFP $\lambda$ /cl <sub>857</sub>                                                                   | This study            |
|                    | MS1883             | MS1843 carrying pML-BlueFP $\lambda$ /cl <sub>857</sub>                                                                 | This study            |
|                    | MS1972             | $\Delta$ wbeT derivative of A493 El Tor, O1 Inaba                                                                       | This study            |

311

## 312 Constructing Isogenic strains.

313 In order to construct isogenic strains that were Ogawa or Inaba gene replacement  
314 was achieved using the suicide vector pMT- suicide/*sacB*(27) (Genebank accession:  
315 KF188719.1).

316 Two fragments flanking the *wbeT* gene were amplified by PCR using primer pairs  
317 *wbeT5* (5'-GGCTTTAGTGAATCGCGATTTGTCGG-3') with  
318 *wbeT\_deletion\_linker\_rev* (5'-  
319 GTCGACGCGGCCGCGATATCACAGAATCAACTTGCAGATGCAGGTTTG-3') and  
320 *wbeVf* (5'-GGCGTATTACGGTACTACAAGGGTCTAG-3') with  
321 *wbeT\_deletion\_linker\_fwd*(5'-  
322 GATATCGCGGCCGCGTCTGACTGCAAGTTCAACAGACATTTCCGAAGAG-3'). The  
323 two resulting fragments were combined using primerless PCR, finally amplifying with  
324 the primer pair *wbeT5/wbeVf* to generate a fragment in which the *wbeT* gene was  
325 deleted. This fragment was inserted into the suicide pMT- suicide/*sacB* and a Km<sup>R</sup>  
326 gene flanked by *lox* sites were inserted between *Sall* and *EcoV* sites, figure S5. The  
327 final plasmid was used to transform *E. coli* strain MFD*pir* and the resulting strain was  
328 used to introduce the plasmid into the recipient strains Phil6973 and A493 conferring  
329 resistance to both kanamycin and chloramphenicol. The two strains were then  
330 passaged for two days in LB broth supplemented with kanamycin before plating out  
331 onto LB agar plates containing no salt but supplemented with sucrose (6% w/v).  
332 Individual colonies were picked onto duplicate LB agar plates supplemented with  
333 kanamycin and chloramphenicol respectively in order to screen for loss of the  
334 plasmid. The resulting strains were Kanamycin resistant and chloramphenicol  
335 sensitive. Deletion of the *wbeT* gene was confirmed by sequencing DNA fragments  
336 obtained by PCR amplification using the primers *wbeT5* and *wbeVf*. In both  
337 generated strains the Km<sup>R</sup> gene was removed by Cre-mediated recombination. The  
338 *cre* gene was introduced using an expression plasmid conferring chloramphenicol  
339 resistance in which the Cre expression was induced by addition of IPTG to the  
340 growth medium. Cells were grown overnight in LB broth supplemented with  
341 chloramphenicol and IPTG to a final concentration of 1 mM. The cells were then  
342 serially diluted and spread on LB agar plates to obtain single colonies. These were  
343 then picked onto duplicate plates to check for sensitivity to kanamycin. A kanamycin  
344 sensitive colony was taken and streaked out onto LB agar. The Cre plasmid was lost

345 due to its inherent instability in the absence of selection with chloramphenicol. The  
346 phenotype of the resulting strains was checked by agglutination with an O1 and  
347 Ogawa-specific monoclonal antibodies (Fitzgerald, United States)

348 In the case of Phil6973 the original strain is Inaba and in order to obtain an Ogawa  
349 derivative, we used the same suicide plasmid-based procedure to introduce a wild-  
350 type *wbeT* gene back into the strain in which the gene had been deleted. In this  
351 case, the selection was based solely on the acquisition and loss of chloramphenicol  
352 resistance combined with a change in phenotype from Inaba to Ogawa.

### 353 Growth curves

354 Bacteria were revived from -80°C glycerol stock on LB-Agar plates at 37°C for 16h. 3  
355 colonies were used for inoculation in 5 ml LB medium for 4h at 37°C at 180 rpm.  
356 Strains were set to the same OD by diluting with PBS and inoculated either in LB  
357 broth, LB broth high salt(28) or AKI(10) medium. The high salt medium was used to  
358 maximize growth owing to the halophilic nature of *V. cholerae*. The inoculated media  
359 were distributed in a 24 or 48 well cell culture plates (Nunc) and were incubated in a  
360 Synergy™ 2 (Biotek, United States) plate reader at 30°C or 37°C, measuring optical  
361 density every 15 min at  $\lambda=600\text{nm}$ .

### 362 Competitive growth.

363 The growth of isogenic strains in competition experiments was done using strains  
364 carrying plasmids pML-GreenFP $\lambda$ /cl<sub>857</sub> and pML-BlueFP $\lambda$ /cl<sub>857</sub> that express the  
365 green fluorescent protein and blue fluorescent protein respectively when induced by  
366 incubation at 42°C. The plasmids are essentially identical except for small  
367 differences in the structural genes of the fluorescent proteins. Furthermore, the  
368 fluorescent proteins are not expressed during the competition experiments since  
369 they were performed at 30°C.

370 Briefly, isogenic pairs of strains, one carrying the pML-GreenFP $\lambda$ /cl<sub>857</sub> plasmid and  
371 pML-BlueFP $\lambda$ /cl<sub>857</sub> were grown up overnight in 5 ml LB broth supplemented with  
372 ampicillin (100  $\mu\text{g/ml}$ ). The cells were washed and resuspended in PBS and the  
373 OD<sub>600</sub> was adjusted to 0.5. The cells were then mixed in at a ratio of 1:1. Serial  
374 dilutions of the suspension were then spread onto LB agar plates supplemented with

375 ampicillin (100 µg/ml) and incubated at 30°C overnight in order to determine the  
376 actual number of colony-forming units (CFUs). In order to determine the ratio of  
377 Inaba to Ogawa cells in the suspension after growth overnight at 30°C, the plates  
378 were transferred to 42°C in order to express the green and blue fluorescent proteins.  
379 The actual ratio of one serotype to the other was determined by counting the number  
380 of colonies expressing each of the fluorescent proteins.  
381 50 µl of the mixed cell suspension was used to inoculate 5 ml LB broth  
382 supplemented with ampicillin and the resulting culture was incubated at 30°C for 14h  
383 with shaking (180 rpm). Serial dilutions of the culture were again spread onto LB  
384 agar plates in order to determine the total number of CFUs and the ratio of Inaba to  
385 Ogawa cells was determined by transferring the plates to 42°C and counting  
386 colonies with different fluorescence.  
387 The cultures were then passaged every 14 hours over a period of five days and the  
388 ratio of Inaba to Ogawa cells determined as described.  
389

## 390 RNA isolations for RNAseq

391 Cultures of each of the isogenic strains MS1571 and MS1712 were grown in  
392 triplicates in 25 ml high salt LB medium at 23°C in 250 ml Erlenmeyer flasks to  $OD_{600}$   
393 = 1.00. RNA extracted using Qiagen RNeasy kit for gram-negative bacteria and  
394 cDNA library preparation was performed using the NuGen Ovation stranded RNAseq  
395 kit with custom rRNA depletion specific for *V. cholerae* and libraries were prepared  
396 from each culture. The sequencing was done using the Illumina HiSeq2000  
397 instrument generating on average 12.6 million reads per sample. The draft genome  
398 of *V. cholerae* strain Phil6973 was ordered based on the *Vibrio cholerae* O1 biovar  
399 El Tor N16961 complete genome using Mauve order contig tool(29). The ordered  
400 contigs were annotated using the prokka pipeline(30) using a manually curated  
401 annotation of the N16961 genome, replacing the split open reading frames VC0255  
402 and VC0256 with a wild-type WbeT protein sequence (GenBank: JF284685.1) as the  
403 primary reference source. The annotated genome was used to create a library for  
404 the STAR aligner(31) and used as a reference for downstream alignment of the  
405 RNA-seq reads. After quality trimming and filtering of the sequence data using  
406 TrimGalore(32), the reads were mapped to the Phil6973 reference, as described

407 above and counting of the transcripts was performed using HTSeq-count(33).  
408 Statistical analysis and differential expression analysis was performed using the  
409 DESeq2 R package(34).

## 410 RNA isolations for RT-PCR

411 Cultures of each of the isogenic strains A493 and MS1843 were grown on LB plates  
412 at 30°C overnight. 5 colonies of each culture were used to inoculate 10ml AKI  
413 medium, incubated at 30°C standing still for 4 hours. 2 ml of the culture was  
414 centrifuged for 2 minutes at 13'000xg. The pellet was resuspended in 0.5 ml RNA  
415 Later (Qiagen, Germany), stored at 4°C overnight and then transferred to -80°C until  
416 time for RNA extraction. For the *in vivo* samples; at the time of sacrifice, the intestine  
417 was placed in an Eppendorf tube containing 0.5ml RNALater (Qiagen, Germany), cut  
418 into small pieces with scissors and immediately placed on ice. The intestine was  
419 stored at 4°C O/N and then transferred to -80°C until time for RNA extraction. RNA  
420 was extracted using the SV Total RNA Isolation System (Z3100, Promega, USA) for  
421 gram-negative bacteria and cDNA library preparation was performed using the  
422 GoTaq® 2-Step RT-qPCR System (A6010, Promega, USA). The RT-PCR was done  
423 using the Applied Biosystems™ 7500 Real-Time PCR System and primers shown in  
424 the supplementary data table S2 (35-38). CT values were normalized using the  
425 expression of the housekeeping gene *recA* (VC0543) before comparison of the  
426 expression of virulence and quorum sensing genes in the Ogawa and Inaba  
427 serotypes.

428

429

## 430 Infant mouse infection model

431 Pregnant female Swiss outbred CD1 mice were purchased from Charles River  
432 Laboratories (Germany) and housed at Lab of Experimental Biomedicine  
433 (Gothenburg, Sweden). Four days after birth infant mice weighing  $3.6 \pm 0.9$  grams  
434 were separated from their mothers, individually marked, and placed at 26°C for 4  
435 hours before being randomly grouped and infected with virulent *V. cholerae* bacteria.  
436 Group sized was determined depending on the number of pups born, normally ten  
437 mice per group, and never fewer than four.



438 To maximize the efficiency of infection bacteria were cultured in AKI medium without  
439 shaking to an OD<sub>600</sub> value of approximately 0.5. The cells were then centrifuged  
440 13'300xg for 2 minutes and re-suspended in fresh PBS and the OD<sub>600</sub> was adjusted  
441 to 0.5 whereafter the suspension was diluted 1:20. Blue food dye (E133, Dr. Oetker,  
442 Germany) was added to the suspension to a final concentration of 0.05%.

443 The infant mice were orally infected at 1300-1330 by gastric gavage using a non-  
444 cutting, round-tip stainless steel feeding needle (AgnTho's AB, Sweden, 7900 = 25  
445 mm 24G) with 50µl blue suspension (approx.  $7.5 \times 10^5$  CFU) or PBS and were kept in  
446 the dark in groups at 26°C for 20 hours and sacrificed between 0900-0930 the day  
447 after.

448 All stages of the experiments were blinded in that the staff doing the infections did  
449 not know which strain they were infecting with and did not know which group were  
450 treated with what when assessing the clinical criteria.

451 Animals that during the course of the experiments showed clinical signs of severe  
452 disease i.e. change of skin coloration from pink to blue or grey, labored breathing  
453 and persistent recumbency, were immediately euthanized.

454  
455 The weight of each mouse was measured before the experiment start( $w_s$ ),  
456 immediately after infection( $w_0$ ), and 20h after infection( $w_{20}$ ). Weight loss at 20h was  
457 calculated as a ratio  $((w_0 - w_{20})/w_0)$  expressed as a percentage.

458  
459 20h after infection the intestine (duodenum to rectum) was removed and its weight  
460 was measured( $w_i$ ). The intestine to carcass was calculated as a ratio  $(w_i/(w_{20} - w_i))$ .  
461 The intestines were homogenized in 1ml PBS using a stainless steel bead (cat no  
462 69989, QIAGEN, Netherlands) and a TissueLyser II (QIAGEN, Netherlands) Time: 8  
463 min, Frequency 30/s. A serial dilution of the homogenized material was plated out  
464 onto blood agar (Substrat, Sahlgrenska Universitetssjukhuset, Sweden) and  
465 Thiosulfate-citrate-bile salts-sucrose agar plates (86348, Merck, Germany). The  
466 number of *Vibrio cholerae* CFU per intestine was calculated.

## 467 Ethical statement

468 All animals were housed under specific-pathogen-free conditions and all treatments  
469 and procedures were performed in accordance with the Swedish Animal Welfare Act

470 (1988:534) and the Animal Welfare Ordinance (1988:539). Approval for the study  
471 was given by the Ethical Committee for Laboratory Animals in Gothenburg, Sweden  
472 (Ethical number 81/2016).

473 In order to minimize suffering, animals that during the course of the experiments  
474 showed clinical signs of severe disease i.e. change of skin coloration from pink to  
475 blue or grey, labored breathing and persistent recumbency, were immediately  
476 euthanized.

## 477 Statistical analysis

478 Statistical analysis and differential expression analysis of RNAseq data were  
479 performed using the DESeq2 R package(34).

480 For data from CTB production experiment under AKI conditions, 10 cultures of each  
481 strain were cultivated and each sample was analyzed twice by GM1 ELISA. The  
482 mean value for each culture were used for the Two-tailed Unpaired t-test giving the  
483 following results:  $p=0.0036$ ,  $t=3.345$ ,  $df=18$ .

484 For data from the infant mouse experiments significance levels have been  
485 calculating using One-way ANOVA with Tukey's multiple comparisons test regarding  
486 p adjusted values less than 0.05 as significant. Total number of mice per group from  
487 7 independent experiments: MS1571 (23), MS1712 (23), MS1712 10x dose (6),  
488 phil6973 (16), PBS (23), and A493 (41), MS1843 (32), MS1972(10), MS1843 x10  
489 dose (12), PBS (23). Brown-Forsythe test: F (DFn, DFd) values for: MS1571 vs  
490 MS1712 Weight loss 0,7199 (5, 89), Intestine/Carcass 6,438 (5, 90), Number of VC  
491 1,58 (4, 66). A493 vs MS1843 Weight loss 4,424 (3, 75), Intestine/Carcass F 7,485  
492 (3, 112), Number of VC F 1,199 (2, 82).

493 Data were analyzed with Prism 7.03 (GraphPad Software inc.)

## 494 References.

- 495 1. Ali M, Nelson AR, Lopez AL, Sack DA. Updated global burden of cholera in  
496 endemic countries. PLoS Negl Trop Dis. 2015;9(6):e0003832.
- 497 2. Cholera – fact sheet N107: World Health Organization; 2018 [cited 2018  
498 October 1, 2018]. Cholera – fact sheet N107]. Available from:  
499 <http://www.who.int/mediacentre/factsheets/fs107/en/>.
- 500 3. Mutreja A, Kim DW, Thomson NR, Connor TR, Lee JH, Kariuki S, et al.  
501 Evidence for several waves of global transmission in the seventh cholera pandemic.  
502 Nature. 2011;477(7365):462-5.

- 503 4. Chatterjee SN, Chaudhuri K. Lipopolysaccharides of *Vibrio cholerae*. I.  
504 Physical and chemical characterization. *Biochim Biophys Acta*. 2003;1639(2):65-79.
- 505 5. Manning PA, Stroehrer UH, Morona R. Molecular Basis for O-Antigen  
506 Biosynthesis in *Vibrio cholerae* O1: Ogawa-Inaba Switching. 1994. In: *Vibrio*  
507 *cholerae* and cholera: molecular to global perspectives [Internet]. Washington, D.C:  
508 American Society of Microbiologists Press; [77-94]. Available from:  
509 [http://books.google.se/books?id=xBhwzHQkdkYC&printsec=frontcover#v=onepage&](http://books.google.se/books?id=xBhwzHQkdkYC&printsec=frontcover#v=onepage&q&f=false)  
510 [q&f=false](http://books.google.se/books?id=xBhwzHQkdkYC&printsec=frontcover#v=onepage&q&f=false).
- 511 6. Bart KJ, Huq Z, Khan M, Mosley WH. Seroepidemiologic studies during a  
512 simultaneous epidemic of infection with El Tor Ogawa and classical Inaba *Vibrio*  
513 *cholerae*. *J Infect Dis*. 1970;121:Suppl 121:17+.
- 514 7. Khan AI, Chowdhury F, Harris JB, Larocque RC, Faruque AS, Ryan ET, et al.  
515 Comparison of clinical features and immunological parameters of patients with  
516 dehydrating diarrhoea infected with Inaba or Ogawa serotypes of *Vibrio cholerae* O1.  
517 *Scandinavian journal of infectious diseases*. 2010;42(1):48-56.
- 518 8. Karlsson SL, Thomson N, Mutreja A, Connor T, Sur D, Ali M, et al.  
519 Retrospective Analysis of Serotype Switching of *Vibrio cholerae* O1 in a Cholera  
520 Endemic Region Shows It Is a Non-random Process. *PLoS Negl Trop Dis*.  
521 2016;10(10):e0005044.
- 522 9. Weill FX, Domman D, Njamkepo E, Tarr C, Rauzier J, Fawal N, et al.  
523 Genomic history of the seventh pandemic of cholera in Africa. *Science*.  
524 2017;358(6364):785-9.
- 525 10. Iwanaga M, Yamamoto K. New medium for the production of cholera toxin by  
526 *Vibrio cholerae* O1 biotype El Tor. *J Clin Microbiol*. 1985;22(3):405-8.
- 527 11. KEGG pathway - Quorum Sensing: Kanehisa Labs; [1 October 2018].  
528 Available from: [https://www.genome.jp/kegg-](https://www.genome.jp/kegg-bin/show_pathway?org_name=vch&mapno=05111)  
529 [bin/show\\_pathway?org\\_name=vch&mapno=05111](https://www.genome.jp/kegg-bin/show_pathway?org_name=vch&mapno=05111).
- 530 12. KEGG pathway - Fructose and mannose metabolism: Kanehisa Labs; [1  
531 October 2018]. Available from: [https://www.genome.jp/kegg-](https://www.genome.jp/kegg-bin/show_pathway?org_name=vch&mapno=00051)  
532 [bin/show\\_pathway?org\\_name=vch&mapno=00051](https://www.genome.jp/kegg-bin/show_pathway?org_name=vch&mapno=00051).
- 533 13. Kanehisa M, Furumichi M, Tanabe M, Sato Y, Morishima K. KEGG: new  
534 perspectives on genomes, pathways, diseases and drugs. *Nucleic Acids Res*.  
535 2017;45(D1):D353-D61.
- 536 14. Kanehisa M, Goto S. KEGG: kyoto encyclopedia of genes and genomes.  
537 *Nucleic Acids Res*. 2000;28(1):27-30.
- 538 15. Kanehisa M, Sato Y, Kawashima M, Furumichi M, Tanabe M. KEGG as a  
539 reference resource for gene and protein annotation. *Nucleic Acids Res*.  
540 2016;44(D1):D457-62.
- 541 16. Baddam R, Sarker N, Ahmed D, Mazumder R, Abdullah A, Morshed R, et al.  
542 Genome Dynamics of *Vibrio cholerae* Isolates Linked to Seasonal Outbreaks of  
543 Cholera in Dhaka, Bangladesh. *mBio*. 2020;11(1).
- 544 17. Hammer BK, Bassler BL. Quorum sensing controls biofilm formation in *Vibrio*  
545 *cholerae*. *Molecular microbiology*. 2003;50(1):101-4.
- 546 18. Camara M, Hardman A, Williams P, Milton D. Quorum sensing in *Vibrio*  
547 *cholerae*. *Nature genetics*. 2002;32(2):217-8.
- 548 19. Zhu J, Miller MB, Vance RE, Dziejman M, Bassler BL, Mekalanos JJ.  
549 Quorum-sensing regulators control virulence gene expression in *Vibrio cholerae*.  
550 *Proc Natl Acad Sci U S A*. 2002;99(5):3129-34.
- 551 20. Winans SC. A new family of quorum sensing pheromones synthesized using  
552 S-adenosylmethionine and Acyl-CoAs. *Molecular microbiology*. 2011;79(6):1403-6.

- 553 21. Wilson BA, Salyers AA, Whitt DD, Winkler ME. Bacterial pathogenesis : a  
554 molecular approach. Washington: ASM Press; 2011.
- 555 22. Matson JS. Infant Mouse Model of *Vibrio cholerae* Infection and Colonization.  
556 *Methods Mol Biol.* 2018;1839:147-52.
- 557 23. Manneh-Roussel J, Haycocks JRJ, Magan A, Perez-Soto N, Voelz K, Camilli  
558 A, et al. cAMP Receptor Protein Controls *Vibrio cholerae* Gene Expression in  
559 Response to Host Colonization. *MBio.* 2018;9(4).
- 560 24. Lebens M, Karlsson SL, Kallgard S, Blomquist M, Ekman A, Nygren E, et al.  
561 Construction of novel vaccine strains of *Vibrio cholerae* co-expressing the Inaba and  
562 Ogawa serotype antigens. *Vaccine.* 2011;29(43):7505-13.
- 563 25. Ferrieres L, Hemery G, Nham T, Guerout AM, Mazel D, Beloin C, et al. Silent  
564 mischief: bacteriophage Mu insertions contaminate products of *Escherichia coli*  
565 random mutagenesis performed using suicidal transposon delivery plasmids  
566 mobilized by broad-host-range RP4 conjugative machinery. *J Bacteriol.*  
567 2010;192(24):6418-27.
- 568 26. Jonson G, Sanchez J, Svennerholm AM. Expression and detection of different  
569 biotype-associated cell-bound haemagglutinins of *Vibrio cholerae* O1. *Journal of*  
570 *general microbiology.* 1989;135(1):111-20.
- 571 27. Karlsson SL, Ax E, Nygren E, Källgård S, Blomquist M, Ekman A, et al.  
572 Development of Stable *Vibrio cholerae* O1 Hikojima Type Vaccine Strains Co-  
573 Expressing the Inaba and Ogawa Lipopolysaccharide Antigens. *PloS one.*  
574 2014;9(11):e108521.
- 575 28. Ishikawa T, Sabharwal D, Broms J, Milton DL, Sjostedt A, Uhlin BE, et al.  
576 Pathoadaptive conditional regulation of the type VI secretion system in *Vibrio*  
577 *cholerae* O1 strains. *Infect Immun.* 2012;80(2):575-84.
- 578 29. Rissman AI, Mau B, Biehl BS, Darling AE, Glasner JD, Perna NT. Reordering  
579 contigs of draft genomes using the Mauve aligner. *Bioinformatics.* 2009;25(16):2071-  
580 3.
- 581 30. Seemann T. Prokka: rapid prokaryotic genome annotation. *Bioinformatics.*  
582 2014;30(14):2068-9.
- 583 31. Dobin A, Davis CA, Schlesinger F, Drenkow J, Zaleski C, Jha S, et al. STAR:  
584 ultrafast universal RNA-seq aligner. *Bioinformatics.* 2013;29(1):15-21.
- 585 32. Krueger F. Trim Galore! v0.3.7. v0.3.7. ed2014. p. A wrapper tool around  
586 Cutadapt and FastQC to consistently apply quality and adapter trimming to FastQ  
587 files, with some extra functionality for MspI-digested RRBS-type (Reduced  
588 Representation Bisulfite-Seq) libraries.
- 589 33. Anders S, Pyl PT, Huber W. HTSeq--a Python framework to work with high-  
590 throughput sequencing data. *Bioinformatics.* 2015;31(2):166-9.
- 591 34. Anders S, Huber W. Differential expression analysis for sequence count data.  
592 *Genome Biol.* 2010;11(10):R106.
- 593 35. Herzog R, Peschek N, Frohlich KS, Schumacher K, Papenfort K. Three  
594 autoinducer molecules act in concert to control virulence gene expression in *Vibrio*  
595 *cholerae*. *Nucleic Acids Res.* 2019;47(6):3171-83.
- 596 36. Gubala AJ. Multiplex real-time PCR detection of *Vibrio cholerae*. *Journal of*  
597 *microbiological methods.* 2006;65(2):278-93.
- 598 37. Abuaita BH, Withey JH. Termination of *Vibrio cholerae* virulence gene  
599 expression is mediated by proteolysis of the major virulence activator, ToxT.  
600 *Molecular microbiology.* 2011;81(6):1640-53.

601 38. Amin Marashi SM, Rajabnia R, Imani Fooladi AA, Hojati Z, Moghim S, Nasr  
 602 Esfahani B. Determination of ctxAB expression in Vibrio cholerae Classical and El  
 603 Tor strains using Real-Time PCR. Int J Mol Cell Med. 2013;2(1):9-13.

## 604 Financial disclosure.

605 This work was supported by grants from the Swedish Foundation for Strategic  
 606 Research (Infection Biology Program). The funders had no role in study design, data  
 607 collection, and analysis, decision to publish, or preparation of the manuscript.

## 608 Author contributions.

| <b>Contributor Role</b>                     | <b>Role Definition</b>                                                                                                                                                                                         | <b>Author</b>               |
|---------------------------------------------|----------------------------------------------------------------------------------------------------------------------------------------------------------------------------------------------------------------|-----------------------------|
| <b>Conceptualization</b>                    | Ideas; formulation or evolution of overarching research goals and aims.                                                                                                                                        | SN, MRL                     |
| <b>Data Curation</b>                        | Management activities to annotate (produce metadata), scrub data and maintain research data (including software code, where it is necessary for interpreting the data itself) for initial use and later reuse. | SN, KT                      |
| <b>Formal Analysis</b>                      | Application of statistical, mathematical, computational, or other formal techniques to analyze or synthesize study data.                                                                                       | SN, KT, JH, MRL             |
| <b>Funding Acquisition</b>                  | Acquisition of the financial support for the project leading to this publication.                                                                                                                              | JH, ML                      |
| <b>Investigation</b>                        | Conducting a research and investigation process, specifically performing the experiments, or data/evidence collection.                                                                                         | SN, KT, FJ, ML, AH.         |
| <b>Methodology</b>                          | Development or design of methodology; creation of models                                                                                                                                                       | SN, KT, MRL, JH             |
| <b>Validation</b>                           | Verification, whether as a part of the activity or separate, of the overall replication/reproducibility of results/experiments and other research outputs.                                                     | SN, MRL                     |
| <b>Writing – Original Draft Preparation</b> | Creation and/or presentation of the published work, specifically writing the initial draft (including substantive translation).                                                                                | SN, MRL                     |
| <b>Writing – Review &amp; Editing</b>       | Preparation, creation and/or presentation of the published work by those from the original research group, specifically critical review, commentary or revision – including pre- or post-publication stages.   | SN, MRL, JH, KT, FJ, ML, AH |

610

611

## 612 Data availability

613 All data generated or analyzed during this study are either included in this published  
614 article (and its supplementary information files) or are available from the  
615 corresponding author on reasonable request.

## 616 Competing interests.

617 The authors have declared that no competing interests exist.

618

## 619 Figures.

620 **Fig 1, Direct comparison of growth and CTB production of Ogawa and Inaba**  
621 **isogenic strains.** The two isogenic strains MS1571 and MS1712 were grown under  
622 different conditions A) LB at 37°C, B) LB high salt 30°C, C) AKI medium 30°C. No  
623 differences in growth were detected. Ogawa strains in blue and Inaba strains in  
624 dotted red. D) In separate experiments levels of CTB production were measured  
625 after growth under AKI conditions O/N. Mean +- SEM Two-tailed Unpaired t-test  
626  $p=0.0036$ ,  $t=3.345$ ,  $df=18$ .

627

628 **Fig 2. Transcriptomic analysis of the isogenic strains of MS1571 and MS1712.**  
629 (A) significant differences in expression of genes from the purine synthesis pathway  
630 with lower expression in Inaba strains compared to Ogawa strains and (B) observed  
631 differences in genes associated with virulence or quorum sensing. Blue bars  
632 (negative fold change) represent higher expression in Ogawa and Red striped bars  
633 (positive fold change) represent higher expression in Inaba.

634

635 **Fig 3. Pathways in which expression of genes differs significantly between**  
636 **Ogawa and Inaba variants of otherwise isogenic strains.** RNAseq shows  
637 significant changes in expression of genes involved a) in quorum sensing(11), biofilm  
638 formation and bile resistance, and b) on fructose and mannose metabolism(12) using  
639 the KEGG(13-15) pathways as illustration. Genes with higher expression in Ogawa  
640 cells and the reactions their products catalyze are shown in blue and underlined.  
641 Genes with higher expression in Inaba cells and the reactions their products catalyze  
642 are shown in red. Gene products in bold are also represented in figure 4. Genes with  
643 unchanged expression are shown in grey and italic.

644

645 **Fig 4. A gene cluster in *Vibrio cholerae* O1 chromosome 1 with genes**  
646 **significantly differentially expressed in Ogawa and Inaba variants of otherwise**  
647 **isogenic strains.** The genes affected are involved in fructose metabolism and  
648 transport. The roles of VC1820, VC1826, and VC1827 are shown in figure 3B.  
649 VC1825 is an *araC* type regulatory gene controlling the expression of VC1826 and  
650 VC1827. VC1821 and VC1822 are both involved in fructose uptake. VC1824 and  
651 VC1831 are both kinases involved in transmembrane transport. Genes higher

652 expressed in Ogawa (blue), Inaba (red), and genes with no significant difference in  
653 white.

654

655 **Fig 5. Bedding showing staining due to diarrhea from infected infant mice.**

656 Representative images of staining on bedding paper from groups of 12 infant mice  
657 infected with either Ogawa, Inaba, 10x dose Inaba, or PBS. Percentages refer to the  
658 area covered by the blue stain on the bedding paper determined as described in the  
659 materials and methods.

660

661 **Fig 6. Comparison of disease severity using different criteria in infant mice**

662 **infected with isogenic strains that were either Ogawa or Inaba.** Weight loss,  
663 intestine to carcass weight, and the number of *Vibrio cholerae* in the intestine for  
664 both sets of isogenic strains. Pooled data from seven different experiments showing  
665 mean + SEM and p adjusted values less than 0.05. Total number of mice per group  
666 from 7 independent experiments: MS1571 (23), MS1712 (23), MS1712 10x dose (6),  
667 phil6973 (16), PBS (23), and A493 (41), MS1843 (32), MS1972(10), MS1843 x10  
668 dose (12), PBS (23). Brown-Forsythe test: F (DFn, DFd) values for: MS1571 vs  
669 MS1712 Weight loss 0,7199 (5, 89), Intestine/Carcass 6,438 (5, 90), Number of VC  
670 1,58 (4, 66). A493 vs MS1843 Weight loss 4,424 (3, 75), Intestine/Carcass F 7,485  
671 (3, 112), Number of VC F 1,199 (2, 82).

672

673 **Fig 7. RT-PCR analysis of the isogenic strains of A493 and MS1843 *in vivo* and**

674 ***in vitro*.** Observed differences in expression of genes associated with virulence.  
675  $\Delta\Delta CT$  (Ogawa-Inaba) values are shown. Striped green bars and purple bars  
676 represent *in vivo* and *in vitro* expression respectively. Negative  $\Delta\Delta CT$  values  
677 represent higher expression in Ogawa and positive  $\Delta\Delta CT$  values represent higher  
678 expression in Inaba. *In vivo* groups had five animals per group and *in vitro* had six  
679 replicates per group. The results reflect the relative amount of gene expression  
680 comparing Inaba with Ogawa strains after normalization against expression of the  
681 *recA* gene.

682



## 683 Supporting information captions

684 **Figure S1.** Direct comparison of growth of Ogawa and Inaba isogenic strains in LB  
685 growth media at 37°C

686 **Figure S2.** RNAseq Data, Pyrimidine metabolism

687 **Figure S3.** RNAseq Data, Purine metabolism

688 **Figure S4.** Infant Mouse Data.

689 **Figure S5.** Plasmid map for pMT-suicide1-sacB + wbeT + loxP + KmR

690 **Table S1** (Excel). RNAseq results: Genes significantly differentially expressed  
691 comparing strains MS1571 and MS1712 in mid-log phase in high salt medium at  
692 24°C.

693 **Table S2** (Excel). RT-PCR primers

694

695 **Figure 1.**

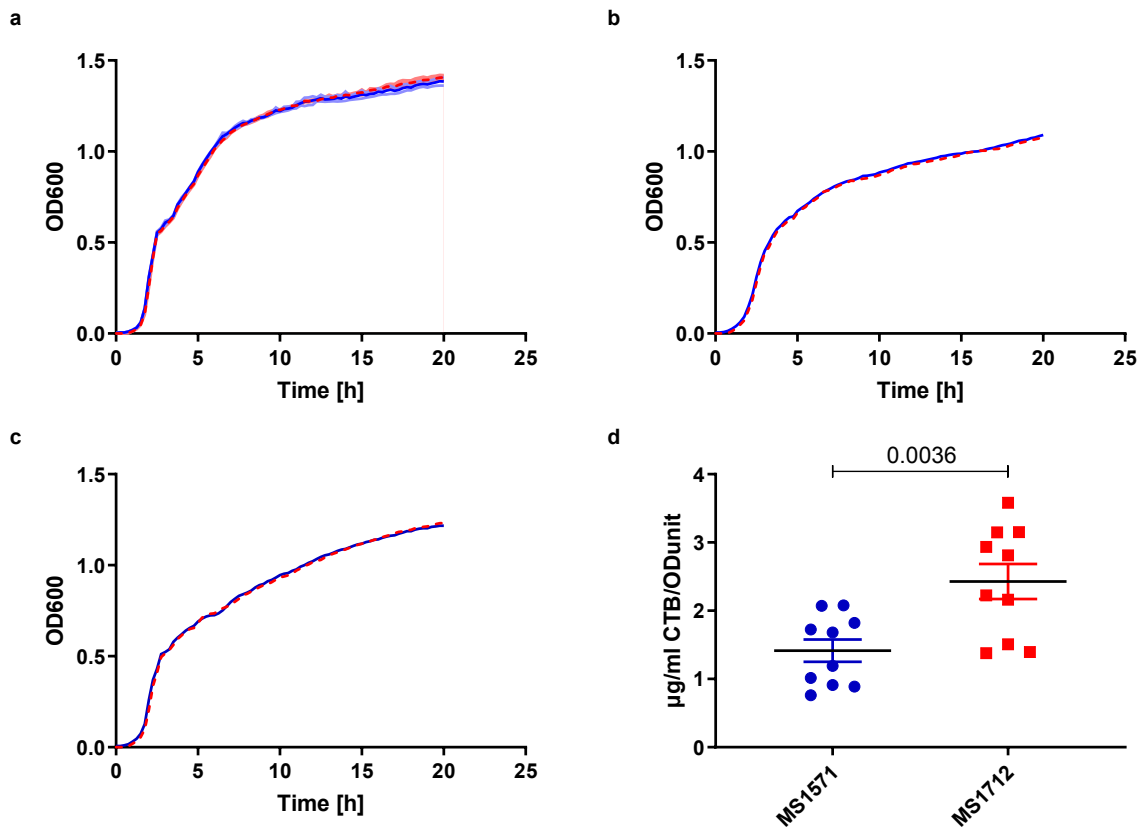

696

697 **Figure 2.**

**A**

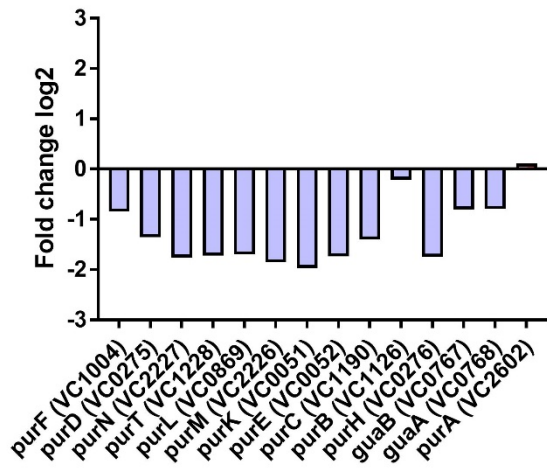

**B**

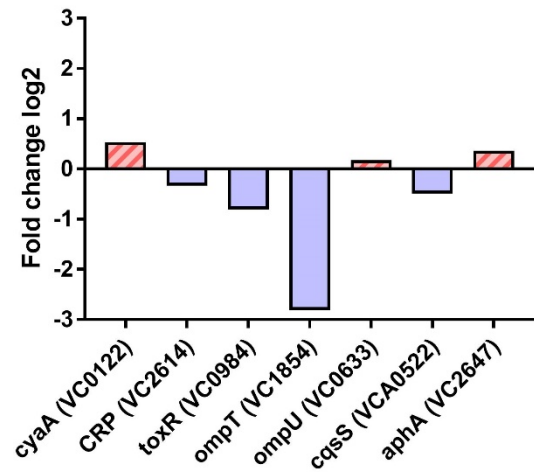

698

699 **Figure 3.**

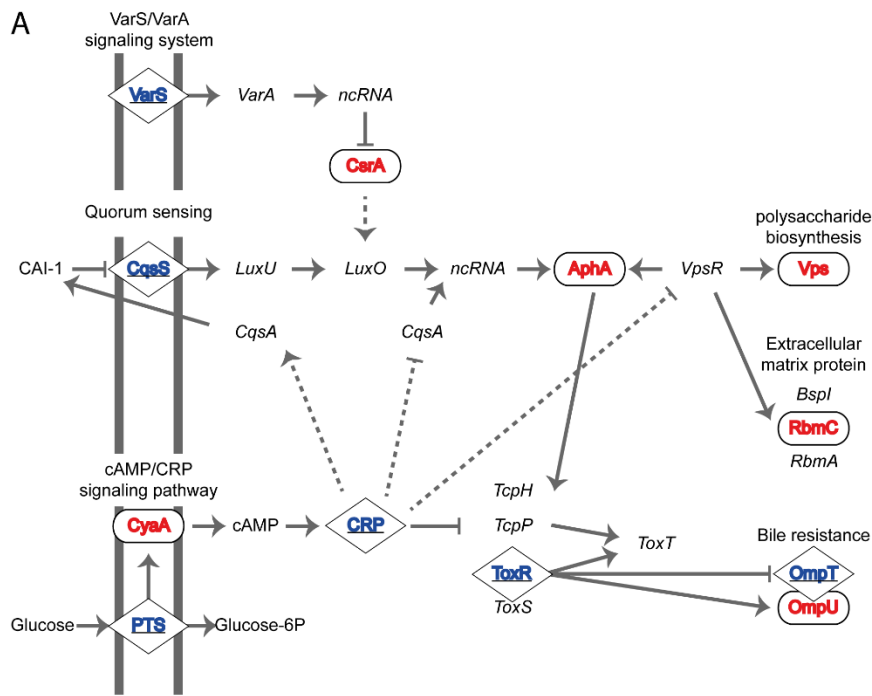

**B**

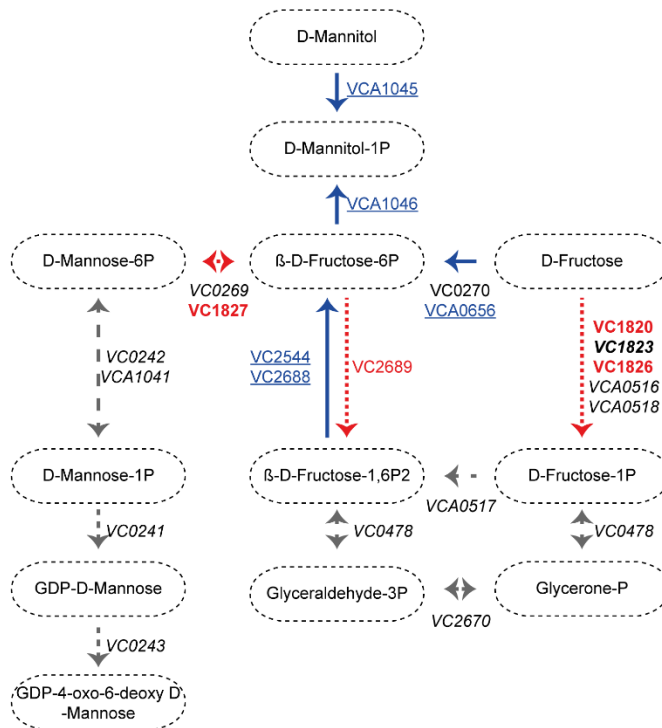

701 **Figure 4.**

702

703

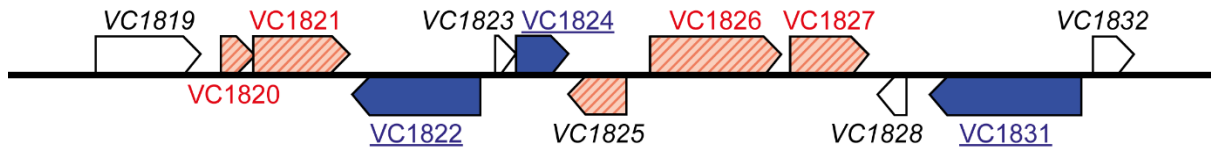

704 **Figure 5.**

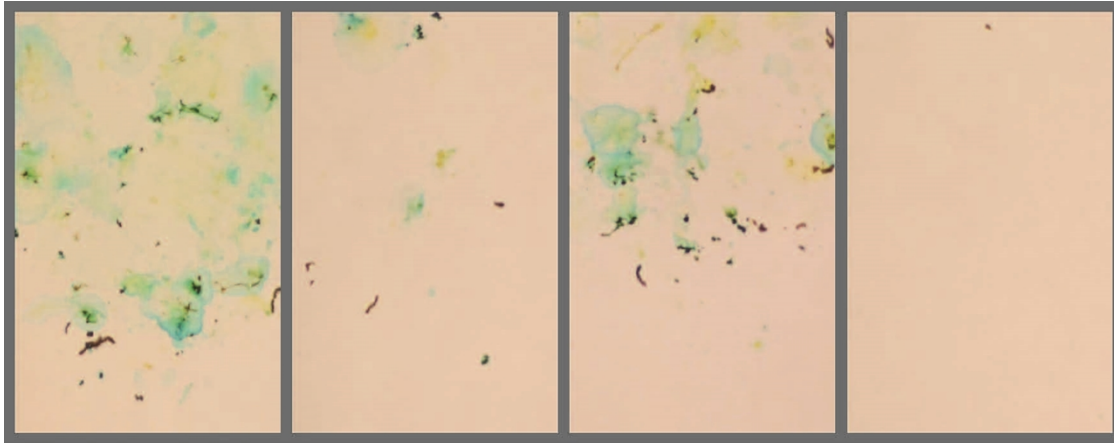

705

|               |               |                   |             |
|---------------|---------------|-------------------|-------------|
| Ogawa<br>1.2% | Inaba<br>0.2% | 10x Inaba<br>0.6% | PBS<br>0.0% |
|---------------|---------------|-------------------|-------------|

706 **Figure 6.**

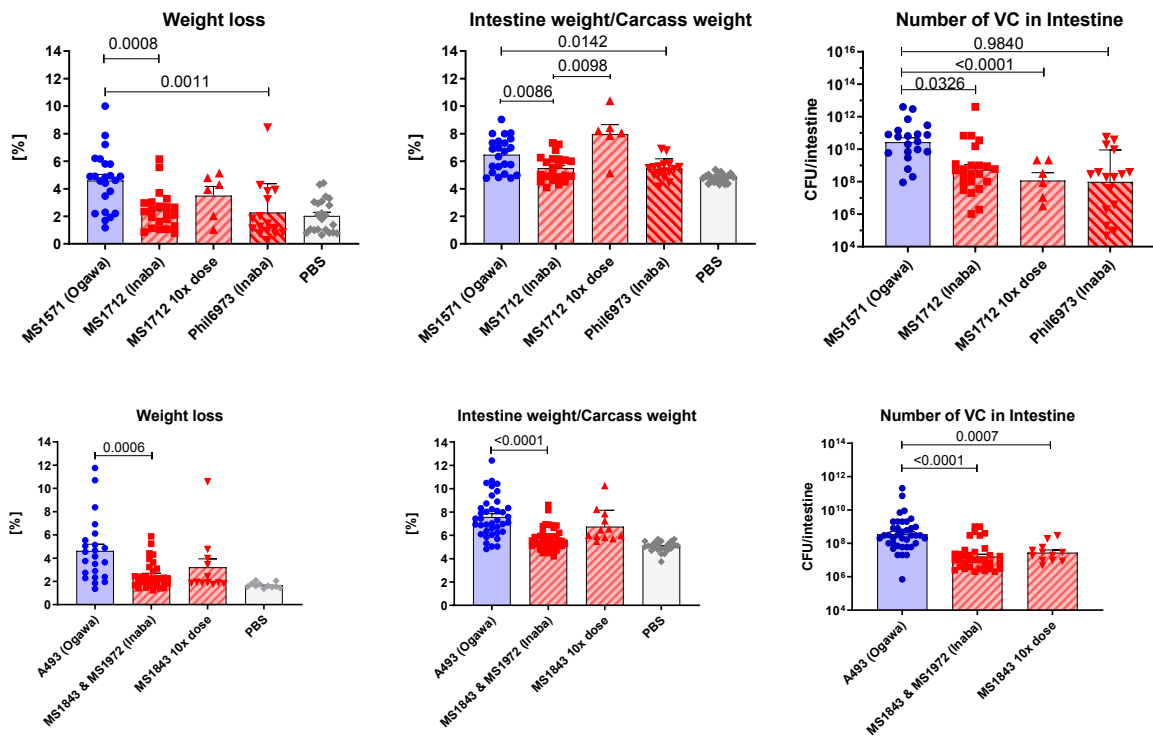

707

708 **Figure 7.**

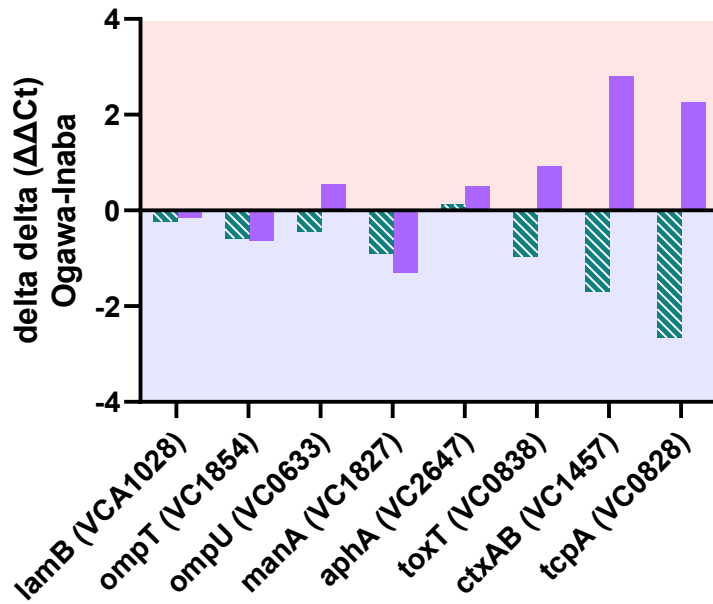

709
